# Supplementary figures and images for: Phytosterols Alleviate Hyperlipidemia by Regulating Gut Microbiota and Cholesterol Metabolism in Mice
Source: Hindawi journal article supplement (doi:10.1155/2023/6409385), 2023-04-26

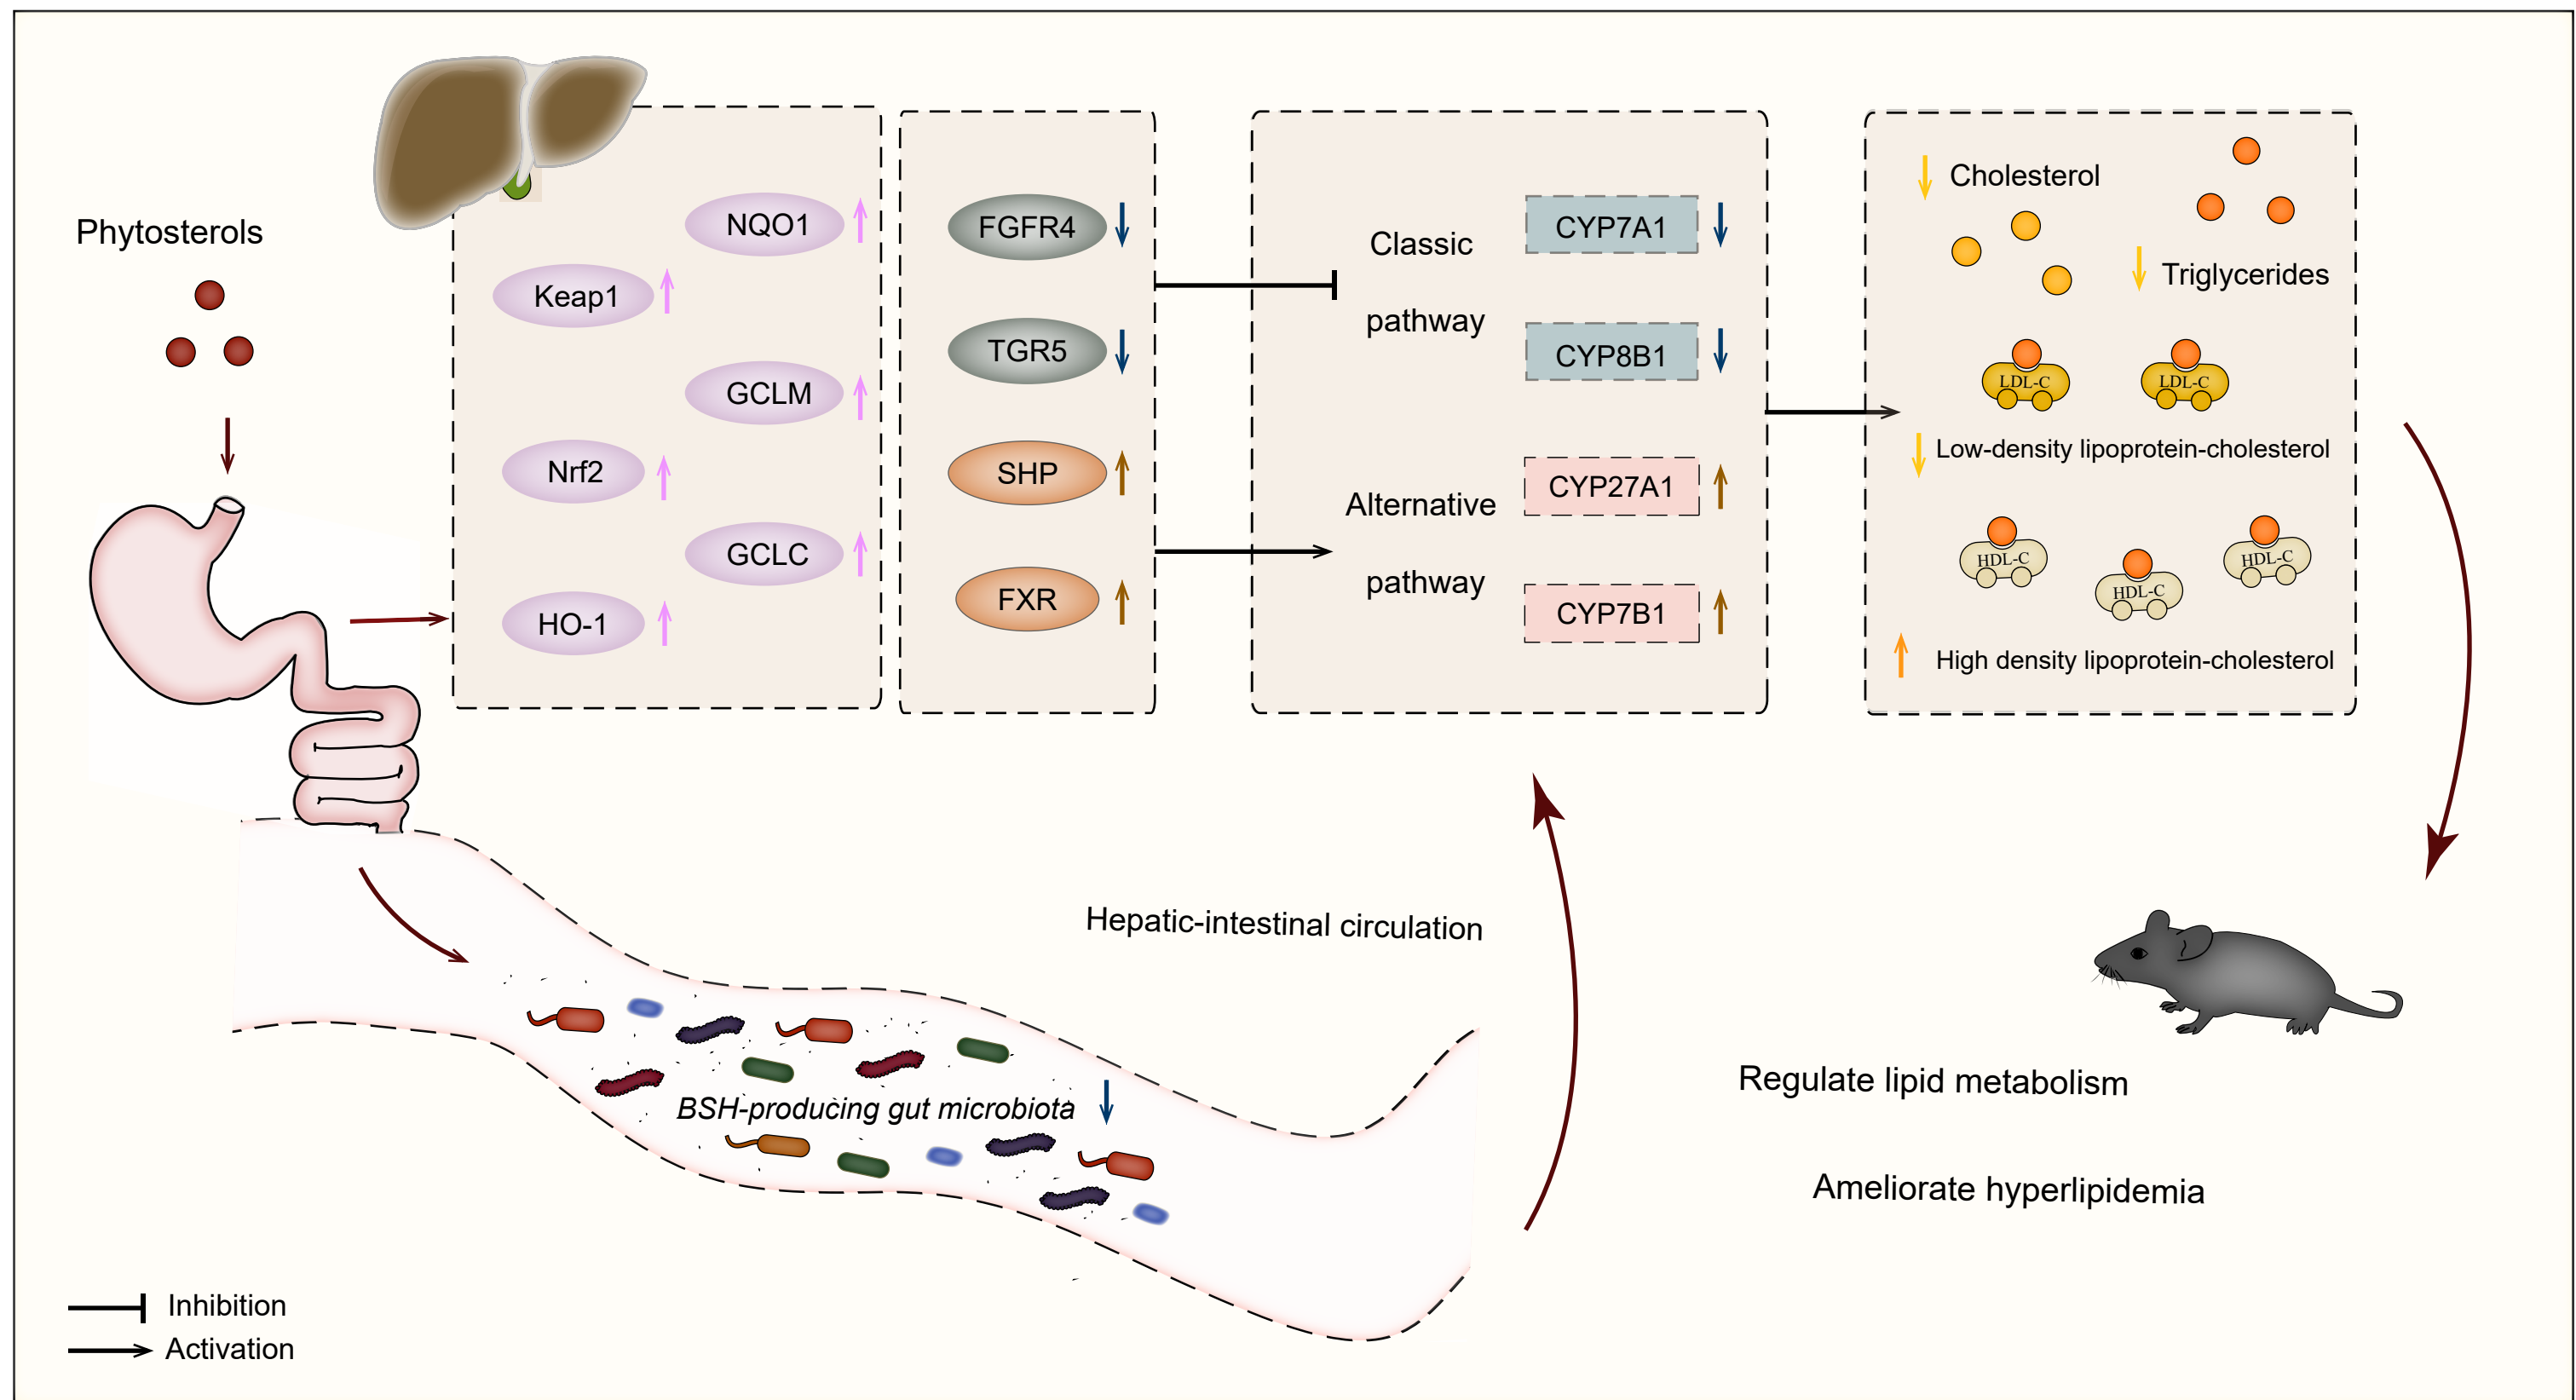

Supplement: f1 [file 6409385.f1.zip]
